# Supplementary material for: A spatially aware likelihood test to detect sweeps from haplotype distributions
Source: PubMed Central journal article supplement (PMC9022890; doi:10.1371/journal.pgen.1010134), 2022-04-11
Supplement: pgen.1010134.s047.pdf [file pgen.1010134.s047.pdf]

| Population | Phased | Top-1% $\Lambda$ | Top-0.1% $\Lambda$ | Max $\Lambda$ |
|------------|--------|------------------|--------------------|---------------|
| CEU        | Yes    | 100.464          | 220.170            | 992.484       |
| CEU        | No     | 43.444           | 96.525.547         | 425.335       |
| YRI        | Yes    | 46.092           | 105.728            | 503.981       |
| YRI        | No     | 19.339           | 38.000             | 145.126       |
