# Supplementary material for: A spatially aware likelihood test to detect sweeps from haplotype distributions
Source: PubMed Central journal article supplement (PMC9022890; doi:10.1371/journal.pgen.1010134), 2022-04-11
Supplement: pgen.1010134.s048.pdf [file pgen.1010134.s048.pdf]

| GO molecular function                | Fold Enrichment | Raw P-value            | FDR                    |
|--------------------------------------|-----------------|------------------------|------------------------|
| MHC class II receptor activity       | > 100           | $4.05 \times 10^{-15}$ | $6.59 \times 10^{-12}$ |
| Immune receptor activity             | 40.58           | $6.92 \times 10^{-9}$  | $4.22 \times 10^{-6}$  |
| CD8 receptor binding                 | > 100           | $1.48 \times 10^{-5}$  | $7.22 \times 10^{-3}$  |
| T cell receptor binding              | > 100           | $3.29 \times 10^{-7}$  | $1.78 \times 10^{-4}$  |
| Protein-containing complex binding   | 5.96            | $2.72 \times 10^{-5}$  | $1.21 \times 10^{-2}$  |
| MHC class II protein complex binding | > 100           | $1.96 \times 10^{-15}$ | $4.79 \times 10^{-12}$ |
| MHC protein complex binding          | > 100           | $1.17 \times 10^{-14}$ | $1.43 \times 10^{-11}$ |
| Beta-2-microglobulin binding         | > 100           | $4.43 \times 10^{-5}$  | $1.80 \times 10^{-2}$  |
| Peptide antigen binding              | > 100           | $4.37 \times 10^{-17}$ | $2.13 \times 10^{-13}$ |
| Peptide binding                      | 24.29           | $6.89 \times 10^{-10}$ | $5.60 \times 10^{-7}$  |
| Amide binding                        | 19.57           | $3.64 \times 10^{-9}$  | $2.54 \times 10^{-6}$  |
| Antigen binding                      | 41.08           | $1.20 \times 10^{-11}$ | $1.17 \times 10^{-8}$  |
