# Supplementary material for: A spatially aware likelihood test to detect sweeps from haplotype distributions
Source: PubMed Central journal article supplement (PMC9022890; doi:10.1371/journal.pgen.1010134), 2022-04-11
Supplement: pgen.1010134.s049.pdf [file pgen.1010134.s049.pdf]

| GO molecular function                | Fold Enrichment | Raw P-value            | FDR                    |
|--------------------------------------|-----------------|------------------------|------------------------|
| MHC class II receptor activity       | > 100           | $6.38 \times 10^{-17}$ | $1.04 \times 10^{-13}$ |
| Immune receptor activity             | 25.82           | $9.27 \times 10^{-12}$ | $9.05 \times 10^{-9}$  |
| MHC class II protein complex binding | > 100           | $2.49 \times 10^{-18}$ | $1.22 \times 10^{-14}$ |
| MHC protein complex binding          | > 100           | $2.86 \times 10^{-17}$ | $6.99 \times 10^{-14}$ |
| Protein-containing complex binding   | 3.70            | $3.52 \times 10^{-5}$  | $1.91 \times 10^{-2}$  |
| Peptide antigen binding              | 93.61           | $2.79 \times 10^{-15}$ | $3.40 \times 10^{-12}$ |
| Peptide binding                      | 10.43           | $2.14 \times 10^{-7}$  | $1.49 \times 10^{-4}$  |
| Amide binding                        | 8.40            | $1.25 \times 10^{-6}$  | $7.60 \times 10^{-4}$  |
| Antigen binding                      | 17.64           | $2.71 \times 10^{-9}$  | $2.20 \times 10^{-6}$  |
