# Supplementary material for: A spatially aware likelihood test to detect sweeps from haplotype distributions
Source: PubMed Central journal article supplement (PMC9022890; doi:10.1371/journal.pgen.1010134), 2022-04-11
Supplement: pgen.1010134.s050.pdf [file pgen.1010134.s050.pdf]

| Population | Data Type | # windows vs. bps | cM vs. bps |
|------------|-----------|-------------------|------------|
| CEU        | Simulated | 0.929             | 0.912      |
| YRI        | Simulated | 0.967             | 0.895      |
| CEU        | Empirical | 0.977             | 0.907      |
| YRI        | Empirical | 0.967             | 0.909      |
