# Supplementary material for: A spatially aware likelihood test to detect sweeps from haplotype distributions
Source: PubMed Central journal article supplement (PMC9022890; doi:10.1371/journal.pgen.1010134), 2022-04-11
Supplement: pgen.1010134.s051.pdf [file pgen.1010134.s051.pdf]

| Chr | Start (bp)  | Stop (bp)   | $\hat{m}$ | $\log_{10}(\hat{A})$ | Max $\Lambda$ | Genes                                                                                                               |
|-----|-------------|-------------|-----------|----------------------|---------------|---------------------------------------------------------------------------------------------------------------------|
| 2   | 135,517,503 | 135,699,618 | 2         | 8.686                | 464.366       | <i>ACMSD</i> , <i>MIR5590</i> , <i>CCNT2-AS1</i> ,<br><i>CCNT2</i>                                                  |
| 2   | 135,699,619 | 135,889,801 | 2         | 8.686                | 469.480       | <i>CCNT2</i> , <i>MAP3K19</i> , <i>RAB3GAP1</i>                                                                     |
| 2   | 135,936,894 | 136,318,298 | 1         | 8.686                | 677.751       | <i>ZRANB3</i> , <i>R3HDM1</i>                                                                                       |
| 2   | 136,494,985 | 136,788,904 | 1         | 8.686                | 890.887       | <i>UBXN4</i> , <i>LCT</i> , <i>LOC100507600</i> ,<br><i>MCM6</i> , <i>DARS</i> , <i>DARS-AS1</i>                    |
| 4   | 34,363,017  | 34,399,713  | 4         | 8.686                | 440.658       | –                                                                                                                   |
| 4   | 61,210,873  | 61,273,068  | 5         | 8.686                | 448.738       | –                                                                                                                   |
| 6   | 32,491,945  | 32,694,523  | 7         | 7.817                | 699.735       | <i>HLA-DRB5</i> , <i>HLA-DRB6</i> , <i>HLA-DRB1</i> ,<br><i>HLA-DQA1</i> , <i>HLA-DQB1</i> ,<br><i>HLA-DQB1-AS1</i> |
