# Supplementary material for: A spatially aware likelihood test to detect sweeps from haplotype distributions
Source: PubMed Central journal article supplement (PMC9022890; doi:10.1371/journal.pgen.1010134), 2022-04-11
Supplement: pgen.1010134.s052.pdf [file pgen.1010134.s052.pdf]

| Chr | Start (bp)  | Stop (bp)   | $\hat{m}$ | $\log_{10}(\hat{A})$ | Max $\Lambda$ | Genes                                                                                 |
|-----|-------------|-------------|-----------|----------------------|---------------|---------------------------------------------------------------------------------------|
| 1   | 196,838,929 | 196,882,435 | 9         | 8.252                | 154.62        | <i>CFHR4</i>                                                                          |
| 1   | 223,285,200 | 223,386,011 | 5         | 8.252                | 197.548       | <i>TLR5</i>                                                                           |
| 3   | 27,139,533  | 27,182,014  | 8         | 8.252                | 154.481       | <i>NEK10</i>                                                                          |
| 3   | 46,040,267  | 46,365,291  | 6         | 8.252                | 348.033       | <i>XCR1, CCR1, CCR3</i>                                                               |
| 3   | 162,438,975 | 162,692,695 | 8         | 8.252                | 296.913       | -                                                                                     |
| 3   | 163,802,717 | 163,857,923 | 8         | 8.252                | 174.977       | -                                                                                     |
| 4   | 12,461,207  | 12,479,264  | 8         | 8.252                | 151.189       | -                                                                                     |
| 4   | 12,503,155  | 12,570,561  | 9         | 8.252                | 168.923       | -                                                                                     |
| 4   | 46,843,639  | 46,884,507  | 9         | 8.252                | 145.785       | <i>COX7B2</i>                                                                         |
| 4   | 74,379,014  | 74,493,240  | 8         | 8.252                | 160.766       | <i>LOC728040, RASSF6</i>                                                              |
| 6   | 31,171,915  | 31,401,004  | 9         | 7.817                | 352.419       | <i>HLA-C, HLA-B, MIR6891, MICA</i>                                                    |
| 6   | 32,510,827  | 32,635,225  | 9         | 7.817                | 248.927       | <i>HLA-DRB6, HLA-DRB1, HLA-DQA1, HLA-DQB1, HLA-DQB1-AS1</i>                           |
| 6   | 32,649,806  | 32,694,318  | 10        | 7.817                | 180.873       | -                                                                                     |
| 6   | 32,978,997  | 33,195,684  | 7         | 7.817                | 324.768       | <i>HLA-DPA1, HLA-DPB1, HLA-DPB2, COL11A2, RXRB, SLC39A7, HSD17B8, MIR219A1, RING1</i> |
| 6   | 130,541,399 | 130,674,414 | 7         | 7.817                | 244.991       | <i>SAMD3</i>                                                                          |
| 7   | 80,186,004  | 80,428,489  | 6         | 8.252                | 207.636       | <i>CD36, SEMA3C</i>                                                                   |
| 8   | 5,767,335   | 5,824,312   | 10        | 8.252                | 165.733       | -                                                                                     |
| 8   | 9,453,656   | 9,697,983   | 8         | 8.252                | 176.026       | <i>TNKS</i>                                                                           |
| 8   | 50,022,640  | 50,229,742  | 8         | 8.252                | 275.713       | -                                                                                     |
| 9   | 11,774,095  | 11,867,257  | 9         | 8.252                | 161.915       | -                                                                                     |
| 9   | 11,898,626  | 11,940,738  | 7         | 8.252                | 166.824       | -                                                                                     |
| 10  | 102,043,692 | 102,310,074 | 6         | 8.252                | 327.657       | <i>BLOC1S2, PKD2L1, SCD, OLMALINC, WNT8B, SEC31B, NDUFB8, HIF1AN</i>                  |
| 11  | 42,559,011  | 42,612,433  | 8         | 8.252                | 152.469       | -                                                                                     |
| 11  | 42,626,446  | 42,711,242  | 8         | 8.252                | 187.084       | -                                                                                     |
| 12  | 79,543,414  | 79,794,477  | 6         | 8.252                | 334.766       | <i>SYT1</i>                                                                           |
| 12  | 82,748,538  | 82,820,129  | 9         | 8.252                | 173.956       | <i>CCDC59, METTL25</i>                                                                |
| 12  | 82,859,617  | 82,931,718  | 8         | 8.252                | 151.183       | <i>METTL25</i>                                                                        |
| 13  | 89,192,255  | 89,235,146  | 9         | 8.252                | 157.25        | <i>LINC00433</i>                                                                      |
| 14  | 48,245,871  | 48,321,935  | 8         | 7.817                | 168.862       | <i>LINC00648</i>                                                                      |
| 14  | 48,355,469  | 48,392,903  | 7         | 7.817                | 151.657       | -                                                                                     |
| 14  | 48,656,257  | 48,694,596  | 9         | 7.817                | 156.422       | -                                                                                     |
| 14  | 106,434,952 | 106,471,410 | 5         | 7.817                | 155.709       | <i>ADAM6</i>                                                                          |
| 15  | 55,111,308  | 55,359,448  | 7         | 8.252                | 302.699       | -                                                                                     |
| 17  | 3,530,561   | 3,658,973   | 6         | 8.252                | 294.719       | <i>SHPK, CTNS, TAX1BP3, P2RX5-TAX1BP3, EMC6, P2RX5, ITGAE, GSG2</i>                   |
| 17  | 60,593,430  | 60,624,708  | 6         | 8.252                | 152.548       | <i>TLK2</i>                                                                           |
| 19  | 38,860,718  | 38,951,198  | 8         | 8.252                | 182.638       | <i>CATSPERG, PSMD8, GGN, SPRED3, FAM98C, RASGRP4, RYR1</i>                            |
| 20  | 37,313,016  | 37,490,473  | 7         | 8.686                | 159.738       | <i>SLC32A1, ACTR5, PPP1R16B</i>                                                       |
| 22  | 36,571,575  | 36,749,069  | 7         | 8.252                | 184.972       | <i>APOL4, APOL2, APOL1, MYH9, MIR6819</i>                                             |
