# Supplementary material for: A spatially aware likelihood test to detect sweeps from haplotype distributions
Source: PubMed Central journal article supplement (PMC9022890; doi:10.1371/journal.pgen.1010134), 2022-04-11
Supplement: pgen.1010134.s053.pdf [file pgen.1010134.s053.pdf]

| Chr | Start (bp)  | Stop (bp)   | $\hat{m}$ | $\log_{10}(\hat{A})$ | Max $\Lambda$ | Genes                                                                |
|-----|-------------|-------------|-----------|----------------------|---------------|----------------------------------------------------------------------|
| 1   | 156,312,419 | 157,034,325 | 3         | 7.765                | 673.695       | <i>Olr23, Olr24, Olr25, Olr27, Olr29, Olr30, Olr32, Olr34, Folh1</i> |
| 1   | 230,123,826 | 230,327,101 | 3         | 7.765                | 177.137       | <i>Slc22a24</i>                                                      |
| 2   | 247,180,473 | 247,304,944 | 1         | 7.727                | 113.896       | <i>Ndst3</i>                                                         |
| 2   | 269,229,545 | 269,542,892 | 1         | 7.727                | 675.289       | <i>Sh3glb1, Clca2, Clca4l, Clca4, Clca1, Clca5, Odf2l</i>            |
| 3   | 10,383,050  | 10,578,622  | 3         | 7.766                | 168.801       | <i>Abo3</i>                                                          |
| 4   | 41,336,974  | 41,611,989  | 1         | 7.910                | 168.115       | <i>Foxp2</i>                                                         |
| 4   | 133,838,379 | 133,973,032 | 3         | 7.910                | 107.921       | <i>Moxd2, Prss58, Tryx5</i>                                          |
| 4   | 211,484,812 | 211,533,858 | 4         | 7.910                | 93.3354       | <i>Clec2e</i>                                                        |
| 4   | 216,573,081 | 216,659,618 | 2         | 7.910                | 106.382       | <i>Cacna1c</i>                                                       |
| 5   | 107,548,396 | 107,587,543 | 1         | 8.226                | 92.9657       | <i>Sh3gl2</i>                                                        |
| 6   | 92,808,416  | 92,850,870  | 3         | 7.837                | 89.5456       | <i>Lrfn5</i>                                                         |
| 7   | 17,187,521  | 17,434,428  | 1         | 7.751                | 147.23        | <i>Vom2r55</i>                                                       |
| 7   | 27,437,241  | 27,591,701  | 2         | 7.751                | 130.023       | <i>Nt5dc3, Stab2</i>                                                 |
| 7   | 29,959,185  | 30,172,142  | 1         | 7.751                | 126.808       | <i>Ano4, Nr1h4</i>                                                   |
| 7   | 45,385,763  | 45,446,200  | 2         | 7.751                | 93.5232       | <i>Slc6a15</i>                                                       |
| 8   | 119,571,436 | 119,673,192 | 1         | 8.378                | 124.087       | <i>Arpp21</i>                                                        |
| 9   | 55,257,470  | 56,770,741  | 1         | 8.134                | 301.09        | <i>Tmeff2</i>                                                        |
| 13  | 1,901,678   | 2,824,028   | 2         | 7.949                | 410.203       | <i>Dsel</i>                                                          |
| 13  | 12,195,969  | 12,424,761  | 2         | 7.949                | 199.78        | <i>Cntnap5c</i>                                                      |
| 13  | 68,568,273  | 68,885,107  | 3         | 7.949                | 508.191       | <i>Brinp3</i>                                                        |
| 14  | 32,656,671  | 32,892,843  | 1         | 7.740                | 204.445       | <i>Igfbp7, Polr2b</i>                                                |
| 17  | 80,051,550  | 80,219,722  | 2         | 7.860                | 103.731       | <i>Fam107b</i>                                                       |
