# Supplementary material for: A spatially aware likelihood test to detect sweeps from haplotype distributions
Source: PubMed Central journal article supplement (PMC9022890; doi:10.1371/journal.pgen.1010134), 2022-04-11
Supplement: pgen.1010134.s054.pdf [file pgen.1010134.s054.pdf]

| Chr | Start (bp)  | Stop (bp)   | $\hat{m}$ | $\log_{10}(\hat{A})$ | Max $\Lambda$ | Genes |
|-----|-------------|-------------|-----------|----------------------|---------------|-------|
| 2   | 96,271,808  | 96,560,663  | 2         | 7.727                | 410.932       | –     |
| 2   | 96,881,372  | 97,074,854  | 3         | 7.727                | 326.032       | –     |
| 2   | 170,378,708 | 170,519,263 | 2         | 7.727                | 95.1473       | –     |
| 2   | 272,083,254 | 272,359,881 | 1         | 7.727                | 241.38        | –     |
| 3   | 23,325,877  | 23,538,235  | 2         | 7.766                | 213.939       | –     |
| 3   | 143,427,703 | 143,448,409 | 1         | 7.766                | 90.6533       | –     |
| 4   | 40,399,215  | 40,462,778  | 1         | 7.910                | 97.1179       | –     |
| 4   | 47,317,126  | 47,413,412  | 3         | 7.910                | 110.665       | –     |
| 4   | 47,479,582  | 47,521,098  | 3         | 7.910                | 91.0695       | –     |
| 5   | 23,200,838  | 23,418,591  | 3         | 8.226                | 164.644       | –     |
| 5   | 136,100,860 | 136,251,275 | 2         | 8.226                | 103.145       | –     |
| 5   | 136,259,254 | 136,263,345 | 2         | 8.226                | 92.3248       | –     |
| 5   | 136,271,400 | 136,321,452 | 2         | 8.226                | 104.762       | –     |
| 5   | 136,904,389 | 136,961,220 | 1         | 8.226                | 99.4727       | –     |
| 5   | 137,107,962 | 137,167,762 | 1         | 8.226                | 91.6863       | –     |
| 6   | 93,246,089  | 93,895,837  | 2         | 7.837                | 285.452       | –     |
| 6   | 128,257,859 | 128,342,359 | 1         | 7.837                | 101.541       | –     |
| 6   | 151,455,228 | 151,704,771 | 1         | 7.837                | 394.659       | –     |
| 6   | 151,877,456 | 151,898,077 | 3         | 7.837                | 94.741        | –     |
| 7   | 19,461,789  | 19,650,647  | 3         | 7.751                | 133.615       | –     |
| 7   | 43,024,984  | 43,049,245  | 2         | 7.751                | 89.1577       | –     |
| 7   | 43,095,862  | 43,141,691  | 2         | 7.751                | 106.754       | –     |
| 7   | 89,090,760  | 89,282,665  | 2         | 7.751                | 142.529       | –     |
| 7   | 109,432,422 | 109,528,692 | 1         | 7.751                | 91.6154       | –     |
| 7   | 127,786,183 | 127,890,186 | 1         | 7.751                | 134.217       | –     |
| 7   | 137,032,536 | 137,122,391 | 1         | 7.751                | 120.846       | –     |
| 8   | 3,092,342   | 3,236,525   | 3         | 8.378                | 113.975       | –     |
| 9   | 56,797,610  | 56,900,761  | 2         | 8.134                | 125.534       | –     |
| 9   | 57,116,060  | 57,176,933  | 1         | 8.134                | 93.6          | –     |
| 9   | 119,697,786 | 119,952,597 | 1         | 8.134                | 192.989       | –     |
| 10  | 28,182,853  | 28,209,022  | 2         | 8.240                | 88.2872       | –     |
| 13  | 3,073,604   | 3,247,275   | 3         | 7.949                | 185.906       | –     |
| 13  | 13,376,314  | 13,603,477  | 1         | 7.949                | 185.505       | –     |
| 13  | 14,872,399  | 14,887,445  | 3         | 7.949                | 88.3306       | –     |
| 13  | 43,647,576  | 43,944,224  | 4         | 7.949                | 235.378       | –     |
| 14  | 20,095,568  | 20,119,479  | 2         | 7.740                | 88.9939       | –     |
| 14  | 30,706,707  | 30,902,046  | 1         | 7.740                | 166.608       | –     |
| 14  | 30,925,938  | 30,979,611  | 1         | 7.740                | 95.0194       | –     |
| 14  | 30,990,277  | 31,067,039  | 2         | 7.740                | 95.3088       | –     |
| 14  | 35,268,129  | 35,338,455  | 1         | 7.740                | 91.7566       | –     |
| 14  | 67,880,756  | 68,116,102  | 1         | 7.740                | 169.303       | –     |
| 14  | 95,349,113  | 95,473,128  | 2         | 4.103                | 135.307       | –     |
| 15  | 57,136,691  | 57,510,633  | 1         | 7.968                | 155.564       | –     |
| 17  | 79,592,898  | 79,717,397  | 1         | 7.860                | 116.18        | –     |
| 18  | 61,104,703  | 61,227,007  | 1         | 8.141                | 123.9         | –     |
| 18  | 61,609,058  | 61,788,832  | 1         | 8.141                | 138.145       | –     |
| 20  | 54,099,523  | 54,274,713  | 3         | 7.885                | 118.206       | –     |
